# Supplementary material for: The interpretable CT-based vision transformer model for preoperative prediction of clear cell renal cell carcinoma SSIGN score and outcome
Source: Springer Nature journal article supplement (doi:10.1186/s13244-025-01972-0), 2025-05-09
Supplement: MOESM1 [file 13244_2025_1972_MOESM1_ESM.pdf]

**The interpretable CT-based vision transformer model for preoperative prediction of clear cell renal cell carcinoma SSIGN score and outcome**

**ELECTRONIC SUPPLEMENTARY MATERIAL**

**Table S1 CT scan parameters**

| CT scanner                | CT 256     | CT 256          | CT 128     | CT 128       | CT 64      | CT 64        | CT 64           | CT 16         | CT 16            |
|---------------------------|------------|-----------------|------------|--------------|------------|--------------|-----------------|---------------|------------------|
| Scanner model             | Brilliance | Revolution      | Somatom    | Somatom      | LightSpeed | Somatom      | Discovery 750   | Brilliance 16 | Brightspeed 16   |
|                           | iCT 256    |                 | Definition | Definition   | VCT        | Sensation 64 |                 |               |                  |
|                           |            |                 |            | Flash        |            |              |                 |               |                  |
| Manufacturer              | Philips    | General         | Siemens    | Siemens      | General    | Siemens      | General         | Philips       | General Electric |
|                           |            | Electric        |            |              | Electric   |              | Electric        |               |                  |
| Gantry rotation time (s)  | 0.5        | 0.28            | 0.33       | 0.28         | 0.5        | 0.5          | 0.5             | 0.5           | 0.6              |
| Tube voltage (kV)         | 120        | 120             | 120-       | 120          | 120        | 120          | 120             | 120           | 120              |
| Tube current              | 250 mA     | 250-400 mA      | 200 mAs    | Ref. 200 mAs | 200 mA     | 200 mAs      | 200-400 mA      | 200 mAs       | 100-400 mA       |
|                           |            | (automatic tube |            | (Care Dose   |            |              | (automatic tube |               |                  |
|                           |            | current         |            | 4D)          |            |              | current         |               |                  |
|                           |            | modulation)     |            |              |            |              | modulation)     |               |                  |
| Detector collimation (mm) | 0.625      | 0.625           | 0.6        | 0.6          | 0.625      | 0.6          | 0.625           | 0.75          | 0.625            |
| Matrix                    | 512×512    | 512×512         | 512×512    | 512×512      | 512×512    | 512×512      | 512×512         | 512×512       | 512×512          |
| Pitch                     | 0.915      | 0.992           | 1.0        | 1.0          | 0.984      | 1.0          | 1.375           | 1             | 1.375            |

|                      |      |      |      |         |   |      |   |   |   |
|----------------------|------|------|------|---------|---|------|---|---|---|
| Slice thickness (mm) | 5    | 5    | 5    | 5       | 5 | 5    | 5 | 5 | 5 |
| Hospital             | a, c | a, f | b, d | a, e, h | c | a, b | g | a | g |

Note- s = second, kV = kilovolt, mA = milliampere, mm = milimetre. a, The Affiliated Hospital of Qingdao University; b, Fudan University Shanghai Cancer Center; c, Yantai Yuhuangding Hospital; d, Weifang People's Hospital; e, The Affiliated Hospital of Jining Medical College; f, The Affiliated Hospital of Shandong University of Traditional Chinese Medicine; g, Shandong Provincial Hospital Affiliated to Shandong First Medical University; h, Rizhao People's Hospital.

**Table S2 The hazard ratio (HR) estimates associated with progression-free survival stratified by ViT models in the clear cell renal cell carcinoma**

| Model | Subgroup                               | Training cohort |              | Test cohort |              |
|-------|----------------------------------------|-----------------|--------------|-------------|--------------|
|       |                                        | HR              | 95% CI       | HR          | 95% CI       |
| CVM   | Intermediate-to-high risk vs. low risk | 3.991           | 2.454-6.490  | 2.589       | 0.869-7.709  |
| RVM   | Intermediate-to-high risk vs. low risk | 5.123           | 2.435-10.778 | 3.195       | 1.627-6.272  |
| CRVM  | Intermediate-to-high risk vs. low risk | 4.548           | 2.887-7.165  | 5.508       | 1.695-17.897 |

Note- CVM= cortical medullary phase (CMP) vision transformer feature model; RVM= renal parenchymal phase (RPP) vision transformer feature model; CRVM= CMP-RPP combined feature vision transformer model; CI= confidence interval.

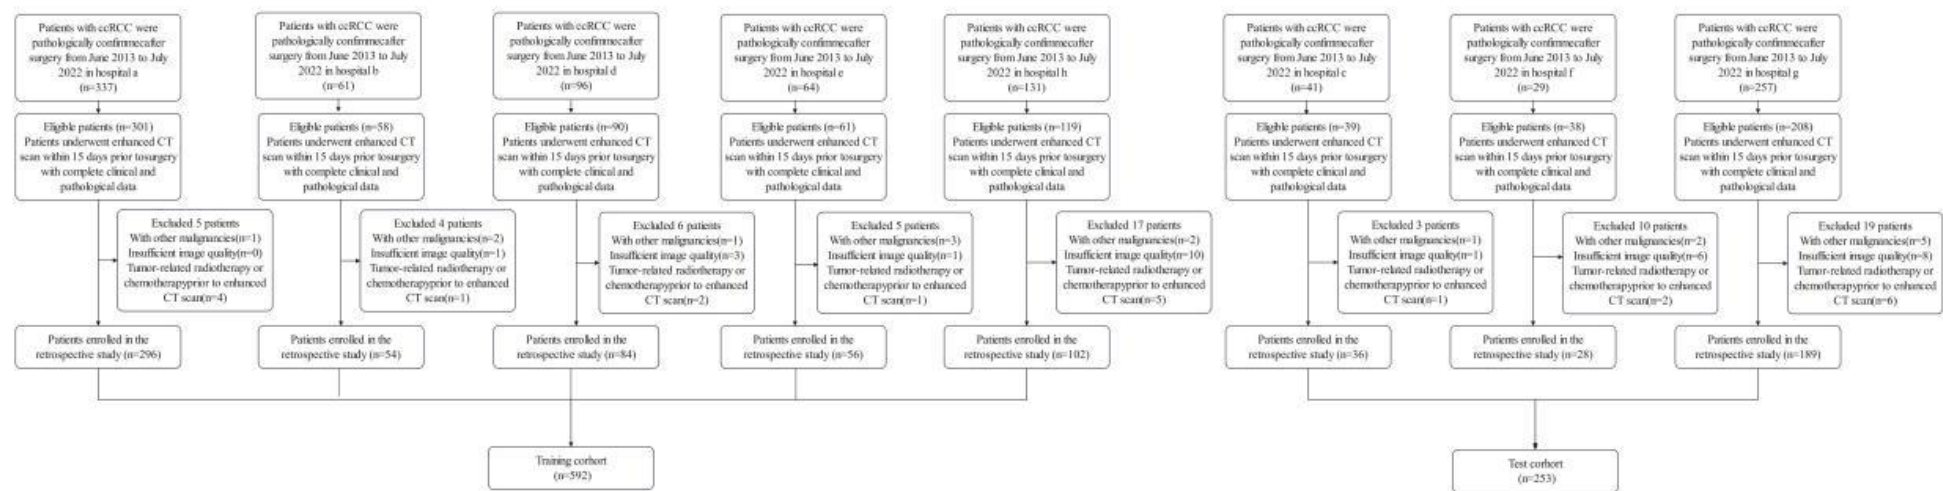

**Figure S1** The detailed recruitment pathway of patients from each center.

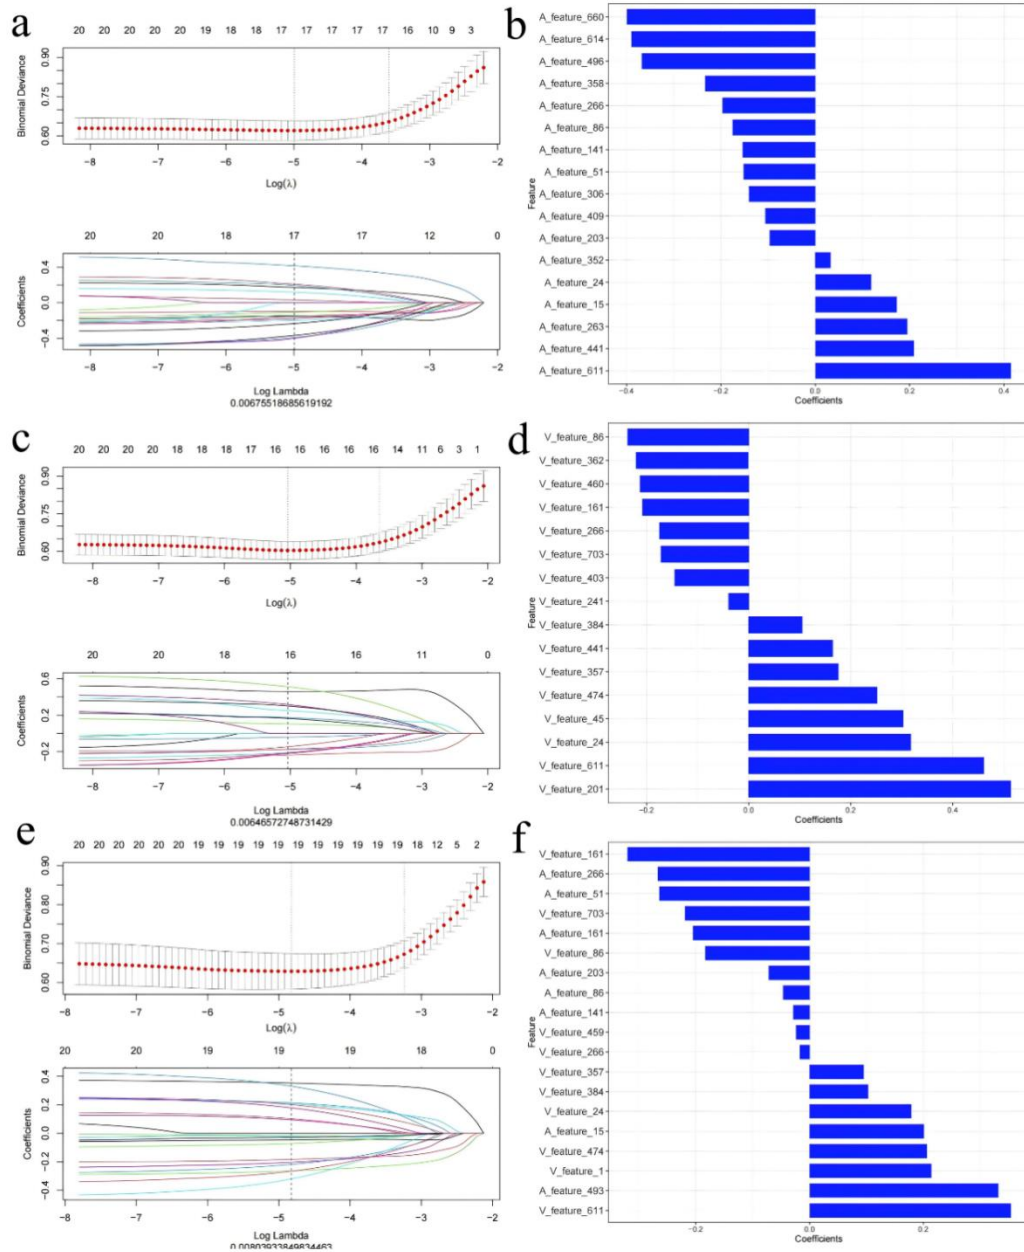

**Figure S2** The ViT features selection by using the LASSO regression model (a, cross-validation parameter selection process and the trajectory dynamics of each cortical medullary phase [CMP] features; b, the final selected CMP features; c, cross-validation parameter selection process and the trajectory dynamics of each renal parenchymal phase [RPP] features; d, the final selected RPP features; e, cross-validation parameter selection process and the trajectory dynamics of each CMP-RPP combined features; f, the final selected CMP-RPP combined features).

## Checklist for Artificial Intelligence in Medical Imaging (CLAIM): 2024 Update

| Section / Topic           | No        | Item                                                                                                          | Page / Line | No | NA |
|---------------------------|-----------|---------------------------------------------------------------------------------------------------------------|-------------|----|----|
| <b>TITLE / ABSTRACT</b>   |           |                                                                                                               |             |    |    |
|                           | <b>1</b>  | Identification as a study of AI methodology, specifying the category of technology used (e.g., deep learning) | <b>1/1</b>  |    |    |
| <b>ABSTRACT</b>           |           |                                                                                                               |             |    |    |
|                           | <b>2</b>  | Summary of study design, methods, results, and conclusions                                                    | <b>1/5</b>  |    |    |
| <b>INTRODUCTION</b>       |           |                                                                                                               |             |    |    |
|                           | <b>3</b>  | Scientific and/or clinical background, including the intended use and role of the AI approach                 | <b>4/8</b>  |    |    |
|                           | <b>4</b>  | Study aims, objectives, and hypotheses                                                                        | <b>6/9</b>  |    |    |
| <b>METHODS</b>            |           |                                                                                                               |             |    |    |
| <i>Study Design</i>       | <b>5</b>  | Prospective or retrospective study                                                                            | <b>6/16</b> |    |    |
|                           | <b>6</b>  | Study goal                                                                                                    | <b>6/18</b> |    |    |
| <i>Data</i>               | <b>7</b>  | Data sources                                                                                                  | <b>7/2</b>  |    |    |
|                           | <b>8</b>  | Inclusion and exclusion criteria                                                                              | <b>6/20</b> |    |    |
|                           | <b>9</b>  | Data pre-processing                                                                                           | <b>8/15</b> |    |    |
|                           | <b>10</b> | Selection of data subsets                                                                                     | <b>8/12</b> |    |    |
|                           | <b>11</b> | De-identification methods                                                                                     | <b>8/7</b>  |    |    |
|                           | <b>12</b> | How missing data were handled                                                                                 |             |    | √  |
|                           | <b>13</b> | Image acquisition protocol                                                                                    | <b>7/19</b> |    |    |
| <i>Reference Standard</i> | <b>14</b> | Definition of method(s) used to obtain reference standard                                                     | <b>7/11</b> |    |    |
|                           | <b>15</b> | Rationale for choosing the reference standard                                                                 |             |    | √  |
|                           | <b>16</b> | Source of reference standard annotations                                                                      |             |    | √  |
|                           | <b>17</b> | Annotation of test set                                                                                        |             |    | √  |
|                           | <b>18</b> | Measures of inter- and intra-rater variability of features described by the annotators                        | <b>7/12</b> |    |    |

|                               |           |                                        |            |  |   |
|-------------------------------|-----------|----------------------------------------|------------|--|---|
| <i><b>Data Partitions</b></i> | <b>19</b> | How data were assigned to partitions   | <b>7/3</b> |  |   |
|                               | <b>20</b> | Level at which partitions are disjoint | <b>7/5</b> |  |   |
| <i><b>Testing Data</b></i>    | <b>21</b> | Intended sample size                   |            |  | √ |



| Section / Topic          | No. | Item                                                                   | Page / Line | No | NA |
|--------------------------|-----|------------------------------------------------------------------------|-------------|----|----|
| <i>Model</i>             | 22  | Detailed description of model                                          | 8/3         |    |    |
|                          | 23  | Software libraries, frameworks, and packages                           | 8/10        |    |    |
|                          | 24  | Initialization of model parameters                                     | 8/18        |    |    |
| <i>Training</i>          | 25  | Details of training approach                                           |             |    | √  |
|                          | 26  | Method of selecting the final model                                    |             |    | √  |
|                          | 27  | Ensembling techniques                                                  |             |    | √  |
| <i>Evaluation</i>        | 28  | Metrics of model performance                                           | 9/5         |    |    |
|                          | 29  | Statistical measures of significance and uncertainty                   | 10/11       |    |    |
|                          | 30  | Robustness or sensitivity analysis                                     | 9/6         |    |    |
|                          | 31  | Methods for explainability or interpretability                         | 9/11        |    |    |
|                          | 32  | Evaluation on internal data                                            | 9/7         |    |    |
|                          | 33  | Testing on external data                                               | 9/7         |    |    |
|                          | 34  | Clinical trial registration                                            |             |    | √  |
| <b>RESULTS</b>           |     |                                                                        |             |    |    |
| <i>Data</i>              | 35  | Numbers of patients or examinations included and excluded              | 10/16       |    |    |
|                          | 36  | Demographic and clinical characteristics of cases in each partition    | 10/16       |    |    |
| <i>Model performance</i> | 37  | Performance metrics and measures of statistical uncertainty            | 11/4        |    |    |
|                          | 38  | Estimates of diagnostic performance and their precision                | 11/4        |    |    |
|                          | 39  | Failure analysis of incorrect results                                  | 15/11       |    |    |
| <b>DISCUSSION</b>        |     |                                                                        |             |    |    |
|                          | 40  | Study limitations                                                      | 16/12       |    |    |
|                          | 41  | Implications for practice, including intended use and/or clinical role | 16/3        |    |    |
| <b>OTHER INFORMATION</b> |     |                                                                        |             |    |    |

|  |           |                                                                                   |              |  |  |
|--|-----------|-----------------------------------------------------------------------------------|--------------|--|--|
|  | <b>42</b> | Provide a reference to the full study protocol or to additional technical details | <b>11/3</b>  |  |  |
|  | <b>43</b> | Statement about the availability of software, trained model, and/or data          | <b>17/20</b> |  |  |
|  | <b>44</b> | Sources of funding and other support; role of funders                             | <b>18/3</b>  |  |  |

\* Indicate page and/or line number for each checklist item that is present. NA = not applicable.
